# Supplementary material for: Theoretical insight into the roles of cocatalysts in the Ni–NiO/β-Ga2O3photocatalyst for overall water splitting
Source: Royal Society of Chemistry journal article supplement (doi:10.1039/c5ta02193f), 2015-01-01
Supplement: c5ta02193f1.pdf [file c5ta02193f1.pdf]

## Supporting Information for:

### Theoretical insight into the roles of cocatalysts in Ni-NiO/ $\beta$ - $\text{Ga}_2\text{O}_3$ photocatalyst for overall water splitting

Taifeng Liu,<sup>ab</sup> Ionut Tranca,<sup>c</sup> Jingxiu Yang,<sup>ab</sup> Xin Zhou<sup>a\*</sup> and Can Li<sup>a\*</sup>

*a* State Key Laboratory of Catalysis, Dalian Institute of Chemical Physics, Chinese Academy of Sciences, Dalian National Laboratory for Clean Energy, Dalian 116023, China. E-mail: [xzhou@dicp.ac.cn](mailto:xzhou@dicp.ac.cn), [canli@dicp.ac.cn](mailto:canli@dicp.ac.cn)

*b* Graduate University of Chinese Academy of Sciences, Beijing 100049, China

*c* Schuit Institute of Catalysis, Laboratory of Inorganic Materials Chemistry, Eindhoven University of Technology, Den Dolech 2, 5612 AZ Eindhoven, The Netherlands

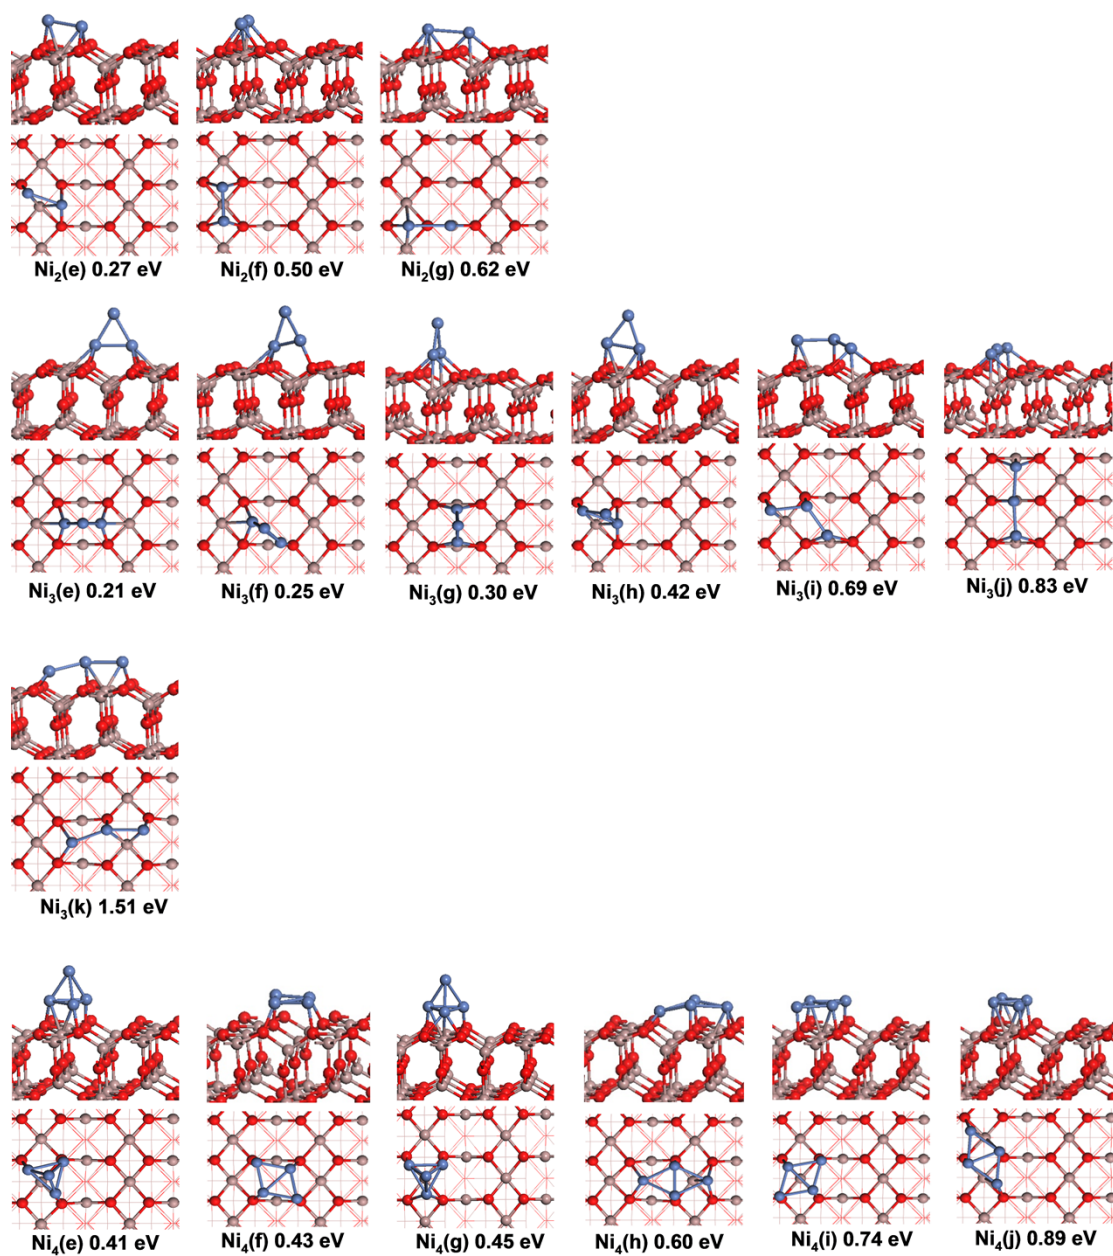

**Figure S1.** Less stable configurations of Ni<sub>n</sub>/Ga<sub>2</sub>O<sub>3</sub>(100) (n=1-4) clusters (side and top views). Relative energies with respect to the corresponding lowest-energy structure are shown. Coloring scheme: red (surface O), brown (Ga) and blue (Ni).

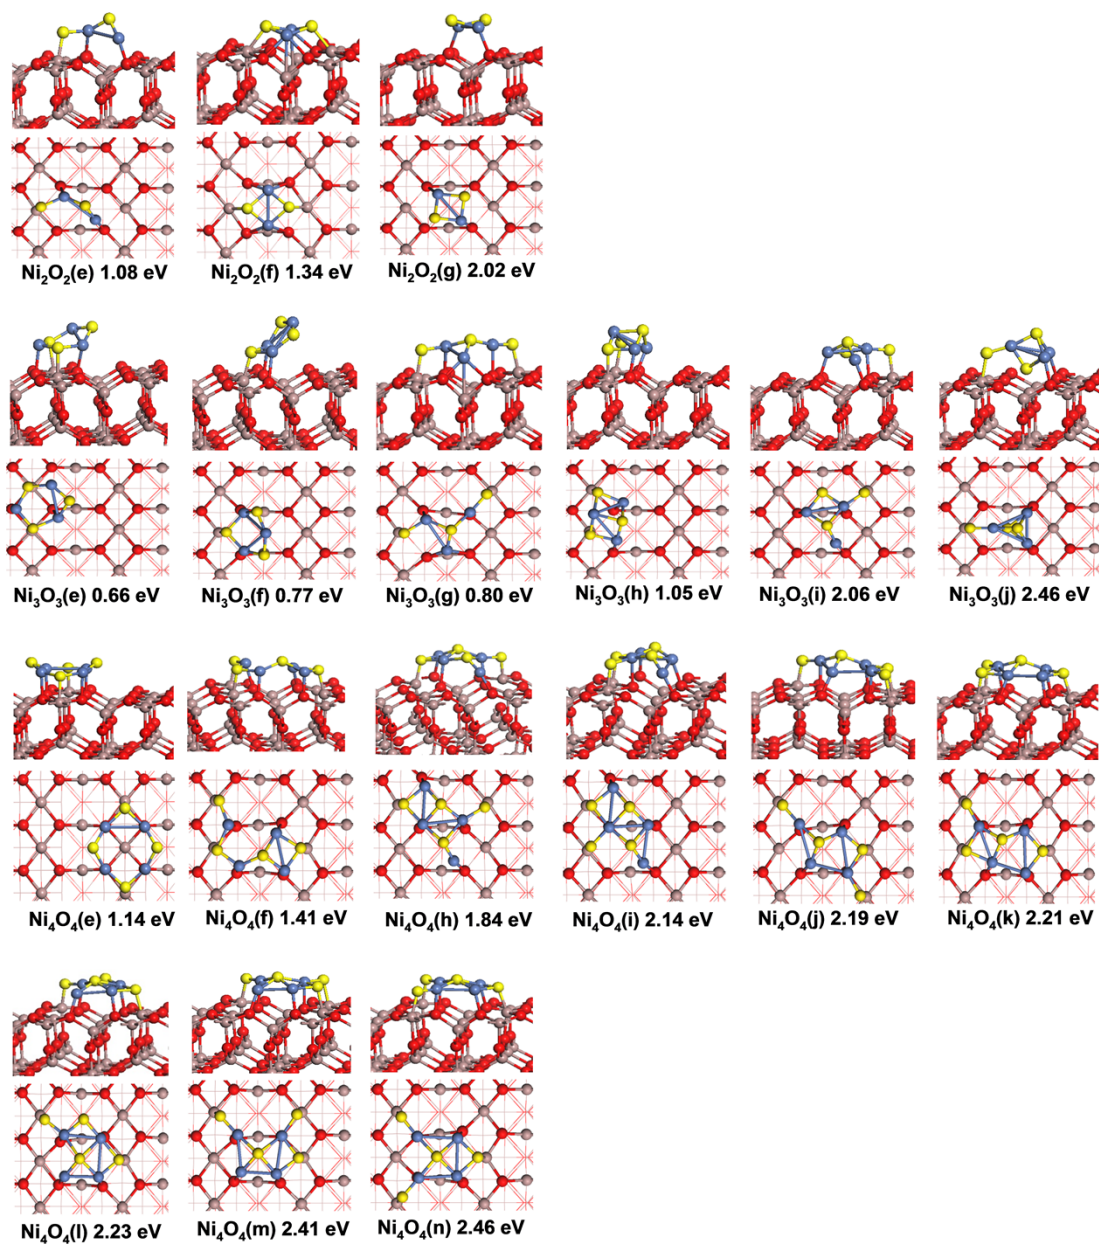

**Figure S2.** Less stable configurations of  $\text{Ni}_n\text{O}_n/\text{Ga}_2\text{O}_3(100)$  ( $n=1-4$ ) clusters (side and top views). Relative energies with respect to the corresponding lowest-energy structure are shown. Coloring scheme: red (surface O), brown (Ga), yellow (adsorbed O) and blue (Ni).
